# Supplementary material
Source: PubMed Central journal article supplement (PMC7535621)
Supplement: mmc1.pdf [file mmc1.pdf]

# THE LANCET Psychiatry

## Supplementary appendix

This appendix formed part of the original submission and has been peer reviewed. We post it as supplied by the authors.

Supplement to: Livingston G, Rostamipour H, Gallagher P, et al. Prevalence, management, and outcomes of SARS-CoV-2 infections in older people and those with dementia in mental health wards in London, UK: a retrospective observational study. *Lancet Psychiatry* 2020; published online Oct 5. [http://dx.doi.org/10.1016/S2215-0366\(20\)30434-X](http://dx.doi.org/10.1016/S2215-0366(20)30434-X).

Supplementary table 1: Descriptive statistics by whether patients died

|                       |                                   | <b>Survived</b> |                             | <b>Died</b> |                             |
|-----------------------|-----------------------------------|-----------------|-----------------------------|-------------|-----------------------------|
| <b>Characteristic</b> |                                   | <b>n/N</b>      | <b>%/Standard deviation</b> | <b>n/N</b>  | <b>%/Standard deviation</b> |
| <b>Mean age</b>       |                                   | 75              | 8                           | 79          | 7                           |
| <b>Age group</b>      | 51 to 64                          | 9/112           | 8                           | 1/19        | 5                           |
|                       | 65 to 80                          | 76/112          | 68                          | 10/19       | 53                          |
|                       | 81 to 95                          | 27/112          | 24                          | 8/19        | 42                          |
| <b>Sex</b>            | Male                              | 53/112          | 47                          | 10/19       | 53                          |
|                       | Female                            | 59/112          | 53                          | 9/19        | 47                          |
| <b>Ethnicity</b>      | White                             | 71/112          | 63                          | 13/19       | 68                          |
|                       | Black African, Caribbean, British | 24/112          | 21                          | 4/19        | 21                          |
|                       | Asian, Asian British              | 11/112          | 10                          | 2/19        | 11                          |
|                       | Mixed/ other                      | 6/112           | 5                           | 0/19        | 0                           |
| <b>Any dementia</b>   | Early onset dementia              | 12/112          | 11                          | 1/19        | 5                           |
|                       | Late onset dementia               | 50/112          | 45                          | 11/19       | 58                          |
|                       | No dementia                       | 50/110          | 45                          | 7/19        | 37                          |
| <b>Legal status</b>   | Informal                          | 20/112          | 18                          | 3/19        | 16                          |
|                       | Mental Health Act Section 2       | 16/112          | 14                          | 3/19        | 16                          |
|                       | Mental Health Act Section 3       | 49/112          | 44                          | 3/19        | 16                          |

|                                           |                                        |         |        |       |        |
|-------------------------------------------|----------------------------------------|---------|--------|-------|--------|
|                                           | Deprivation of Liberty safeguards      | 27/112  | 24     | 10/19 | 53     |
| <b>Any comorbidity</b>                    | Any comorbidity                        | 102/112 | 91     | 19/19 | 100    |
|                                           | Hypertension                           | 63/112  | 56     | 11/19 | 58     |
|                                           | Chronic Cardiac Disease                | 26/112  | 23     | 8/19  | 42     |
|                                           | Any diabetes                           | 24/112  | 21     | 6/19  | 32     |
|                                           | Chronic Kidney Disease                 | 23/112  | 21     | 3/19  | 16     |
|                                           | Chronic Obstructive Pulmonary Disorder | 15/111  | 14     | 5/19  | 26     |
|                                           | Asthma                                 | 7/112   | 6      | 1/19  | 5      |
|                                           | Active cancer                          | 8/112   | 7      | 2/19  | 11     |
|                                           | Number of comorbidities median (IQR)   | 2       | (1, 3) | 2     | (2, 4) |
| <b>Body mass index (kg/m<sup>2</sup>)</b> | <18.5                                  | 14/111  | 13     | 4/19  | 21     |
|                                           | 18.5 to <25                            | 58/111  | 52     | 8/19  | 42     |
|                                           | 25 to <30                              | 29/111  | 26     | 4/19  | 21     |
|                                           | ≥30                                    | 10/111  | 9      | 3/19  | 16     |
| <b>Smoking</b>                            | Non-smoker                             | 68/105  | 65     | 11/19 | 58     |
|                                           | Ex-smoker                              | 28/105  | 27     | 8/19  | 42     |
|                                           | Current smoker                         | 9/105   | 9      | 0/19  | 0      |



Supplementary Table 2:

Change in mental state in those who had dementia or another psychiatric illness.

|                               |                                     | No dementia |          | Dementia   |          |
|-------------------------------|-------------------------------------|-------------|----------|------------|----------|
| <b>Characteristic</b>         |                                     | <b>n/N</b>  | <b>%</b> | <b>n/N</b> | <b>%</b> |
| <b>Age group</b>              | 51 to 64                            | 2/57        | 4        | 11/74      | 15       |
|                               | 65 to 80                            | 45/57       | 79       | 39/74      | 53       |
|                               | 81 to 95                            | 10/57       | 18       | 24/74      | 32       |
| <b>Sex</b>                    | Male                                | 21/57       | 37       | 42/74      | 57       |
|                               | Female                              | 56/57       | 63       | 32/74      | 43       |
| <b>Ethnicity</b>              | White                               | 39/57       | 68       | 45/74      | 61       |
|                               | Black African, Caribbean, British   | 11/57       | 19       | 17/74      | 23       |
|                               | Asian, Asian British                | 5/57        | 9        | 8/74       | 11       |
|                               | Mixed/ other                        | 2/57        | 4        | 4/74       | 5        |
| <b>Change in mental state</b> | Delirium or acute cognitive decline | 15/57       | 26       | 31/74      | 42       |
|                               | Depressive symptoms                 | 5/55        | 9        | 5/74       | 7        |
|                               | Increased level of aggression       | 2/57        | 4        | 8/74       | 11       |
|                               | Visual hallucinations               | 2/52        | 4        | 4/72       | 6        |
|                               | Manic symptoms                      | 1/55        | 2        | 2/72       | 3        |
|                               | Auditory hallucinations             | 1/53        | 2        | 1/71       | 1        |

Supplementary table 3

Univariable and multivariable comparison of mortality odds ratio for people with early onset or no dementia with those with late onset dementia.

|                        |                    | Univariable |                         |         | Multivariable** |                         |         |
|------------------------|--------------------|-------------|-------------------------|---------|-----------------|-------------------------|---------|
|                        |                    | Odds ratio  | 95% Confidence interval | p-value | Odds ratio      | 95% Confidence interval | p-value |
| <b>Dementia status</b> | <b>Late onset</b>  | Reference   |                         |         | Reference       |                         |         |
|                        | <b>Early onset</b> | 0.38        | (0.05, 2.88)            | 0.35    | 0.51            | (0.06, 4.23)            | 0.53    |
|                        | <b>No dementia</b> | 0.64        | (0.37, 1.09)            | 0.10    | 0.64            | (0.38, 1.08)            | 0.09    |

\*\* adjusted for number of comorbidities
